# Supplementary material for: Distribution, origin and cycling of carbon in the Tana River (Kenya): a dry season basin-scale survey from headwaters to the delta
Source: Copernicus journal article supplement (doi:10.5194/bg-6-2475-2009), 2009-11-05
Supplement: Supplementary file 1 [file bg-2009-151-annex_data.xls]

## Sheet: Table 1 
Bouillon et al.
Distribution, origin and cycling of carbon in the Tana River (Kenya): a dry season basin-scale survey from headwaters to the delta.
Biogeosciences xx: xx-xx
Table 1
Overview of physico-chemical and nutrient characteristics of the different sampling sites.
Station	Location	Altitude (m)	Distance from mouth	T (°C)	d18O-H2O (‰)	pH	NO3- (µM)	NH4+ (µM)	PO43- (µM)	SiO4 (µM)
Aberdares
1	Muringato river	2010		18.2	-4.49878	7.50344	16.12	2.34	0.88	375.9
2	Chania river	3020		13	-5.01951	7.72434	1.9	0.23	0.55	270.21
3	Maguru river	3010		11.7	-	7.05161	3.94	0.08	0.13	164.32
4	Karuru, upstream of falls	2940		13.1	-4.44429	7.13728	3.36	0.14	0.14	165.17
Nyambeni Hills / Meru National Park
12	Mutundu river	620		24.1	-4.28399	8.51198	86.46	0.98	4.6	958.74
13	Rojewero river	610		26.9	-4.0933	8.70684	106.14	0.38	3.9	829.09
Mount Kenya
15	Thingithu river	1500		17.5	-4.98598	7.65986	64.89	0.18	0.72	587.49
16	Mara river	1350		20.4	-5.18925	7.69988	15.33	0.35	0.31	364.82
17	Nithi river	1400		19.7	-5.64397	8.19419	6.99	0.63	3.65	433.7
18	Ruguti river	1590		21.8	-5.51824	8.19691	10.26	0.49	0.77	251.34
19	Thuchi river	1440		24.7	-4.86025	8.45671	10.28	1.04	0.5	250.4
Masinga Dam
7	Masinga reservoir	1050		29	-3.08326	8.30218	0.63	0.13	0.12	207.75
8	Masinga reservoir	1050		30.6	-3.21633	8.26442	0.7	0.11	0.12	206.77
9	Masinga reservoir	1050		31.8	-3.02459	8.21365	0.65	0.07	0.12	208.06
10	Masinga reservoir	1050		31.4	-3.02773	8.17176	0.38	0	0.14	208.66
Main Tana River
5	Sagana river, 5km before Masinga dam	1110	1194.26	24.3	-3.51389	7.76143	20.63	1.39	0.5	363.51
6	Tana river just below Masinga dam	1020	1133.37	23.9	-3.4175	7.22023	9.61	0.62	0.14	215.05
11	Tana river between Masinga and Katse	550	1010.38	30.4	-3.51913	7.5159	18.04	0.15	0.55	244.25
14	Tana river at Kora National Park (Adamsons Falls)	350	879.629	25.8	-3.45312	8.16233	18.06	0.05	1.06	288.66
20	Tana river, Sankuri	150	651.25	29.9	-3.07802	8.13936	17	0.69	2.32	308.65
21	Tana river, Nanigi	110	493.142	31	-2.85381	8.24893	17.59	0.91	2.84	306.8
22	Tana river, Masalani	50	260.057	30.1	-2.88314	8.21013	17.73	0.88	3.31	313.82
23	Tana river, Tana River primate reserve	36	198.141	31.1	-2.93763	8.20337	18.92	0.45	3.42	312.66
24	Tana river, Garsen	18	101.156	28.9	-2.73331	8.15578	18.56	1.38	3.55	312.01
25	Tana river (Matombe branch), Chalaluma	8	49.723	31.2	-2.93343	7.82092	17.73	1.2	2.85	304.53

## Sheet: Table 2
Bouillon et al.
Distribution, origin and cycling of carbon in the Tana River (Kenya): a dry season basin-scale survey from headwaters to the delta.
Biogeosciences xx: xx-xx
Table 2
Overview of the available Δ14CPOC and Δ14CDIC data. n.d.: no data.
Station	Location	Δ14CPOC (‰)	Δ14CDIC (‰)
Mount Kenya
19	Thuchi river	n.d.	-658
Main Tana River
5	Sagana river, 5km before Masinga Dam	n.d.	178
6	Tana river, below Masinga Dam	n.d.	-198
11	Tana river between Masinga and Katse	-88	n.d.
14	Tana river at Kora National Park (Adamsons Falls)	-35	-364
20	Tana river, Sankuri	-72	n.d.
21	Tana river, Nanigi	-100	n.d.
22	Tana river, Masalani	-89	n.d.
23	Tana river, Tana River primate reserve	-116	-319
25	Tana river (Matombe branch), Chalaluma	-104	-552

## Sheet: Table 3
Bouillon et al.
Distribution, origin and cycling of carbon in the Tana River (Kenya): a dry season basin-scale survey from headwaters to the delta.
Biogeosciences xx: xx-xx
Table 5
Comparison of selected biogeochemical parameters on the Tana river upstream and downstream of Masinga reservoir, and in surface waters of Masinga (for the latter, n=4).
	above reservoir	Masinga surface water	Tana river, below dam
%O2	88	111 ± 3	41
pH	7.76	8.24 ± 0.06	7.22
NH4+ (µM)	1.39	0.08 ± 0.06	0.62
NO3- (µM)	20.6	0.59 ± 0.14	9.6
PO4+ (µM)	0.5	0.13 ± 0.01	0.14
SiO2 (µM)	364	208 ± 1	215
TSM (mg L-1)	15.8	2.3 ± 0.3	12.2
δ13C-POC (‰)	-22.8	-29.0 ± 0.3	-25.2
δ13C-DOC (‰)	-23.7	-23.9 ± 0.3	-23.9
DOC (mg L-1)	1.01	0.97 ± 0.04	0.98
%POC/TSM	4.2	32.6 ± 3.6	4.6
pCO2 (ppm)	1085	378 ± 57	3572
CH4 (nM)	505	51 ± 7	372
δ18O-DO	22	+19.2 ± 0.2	n.d.
δ18O-H2O	-3.5	-3.1 ± 0.1	-3.4
δ13C-DIC	-7.8	-4.5 ± 0.1	-8.9

## Sheet: Annex Table 1
Bouillon et al.
Distribution, origin and cycling of carbon in the Tana River (Kenya): a dry season basin-scale survey from headwaters to the delta.
Biogeosciences xx: xx-xx
Annex Table 1 (not presented in main manuscript)
This annex Table provides the full data of geochemical characteristics measured in the water column of the various sampling sites, except those presented in other Tables.
Station	Location	TSM (mg L-1)	%O2	d13C-DIC (‰)	d18O-O2 (‰)	DOC (mg L-1)	POC (mg L-1)	PN (mg L-1)	Chl a (µg L-1)	d13C-POC (‰)	d13C-DOC (‰)	TA (mmol kg-1)	DIC (mmol kg-1)	pCO2	CH4 (nM)
Aberdares
1	Muringato river	86.24	106.1	-7.19088	21.6325	2.47542	5.03528	0.466614	n.d.	-25.1067	-25.7927	0.485	0.522	919	314.092
2	Chania river	1.95333	118.5	-6.39488	21.241	0.700818	0.358455	0.0299552	n.d.	-23.8445	-24.0344	0.4565	0.48	488	42.0473
3	Maguru river	2.54667	105	-5.43088	20.837	0.955676	0.5632	0.036027	n.d.	-23.7665	-23.714	0.145	0.181	715	87.171
4	Karuru, upstream of falls	0.624	100.8	-3.48388	21.474	0.667394	0.310871	0.0168445	n.d.	-23.7934	-24.1742	0.151	0.181	615	25.0867
Nyambene Hills / Meru National Park
12	Mutundu river	18.62	104.6	-11.5169	21.703	1.10295	1.00719	0.105396	1.80587	-22.7317	-21.8343	4.8705	4.831	951	409.765
13	Rojewero river	8.84	115.2	-11.2359	21.64	0.891961	1.0165	0.0970276	1.68782	-24.5911	-23.1103	2.456	2.402	308	68.7181
Mount Kenya
15	Thingithu river	25.44	99	-6.50588	21.1775	0.285107	0.911172	0.0711414	0.752661	-25.5551	-23.198	0.784	0.825	1017	62.6325
16	Mara river	11.9067	103	-5.37988	21.467	0.537876	1.10837	0.0907053	0.842096	-25.4509	-25.0448	0.439	0.459	539	39.1853
17	Nithi river	3.53333	103.5	-4.54988		0.72	0.810935	0.0578797	0.696636	-26.3356	-23.7	1.014	1.022	396	40.0104
18	Ruguti river	7.72	111.6	-2.38988	20.6535	0.92	1.21606	0.101137	1.0789	-26.4695	-27.7	0.699	0.703	274	92.2473
19	Thuchi river	10.5467	105.6	-6.62088	20.9555	1.21	1.13064	0.0975798	1.17405	-25.1643	-25	0.4975	0.492	110	55.504
Masinga Dam
7	Masinga reservoir	2.63333	113.7	-4.52488	19.2635	1.02148	0.740236	0.0866263	3.33196	-28.7106	-23.4062	0.916	0.914	313	44.4928
8	Masinga reservoir	1.98333	107.8	-4.43188	19.1995	0.949409	0.698511	0.0728948	3.22513	-29.3414	-24.0281	0.915	0.914	352	44.7056
9	Masinga reservoir	2.1	113.3	-4.43888	18.97	0.981789	0.75061	0.0878171	3.25297	-29.0556	-23.9433	0.919	0.92	405	58.2243
10	Masinga reservoir	2.5	109.8	-4.68588	19.4985	0.944186	0.783332	0.0956717	5.08272	-28.8129	-24.0751	0.9205	0.924	443	56.5542
Main Tana River
5	Sagana river, 5km before Masinga dam	15.7867	88	-7.84888	21.9695	1.01417	0.657178	0.0689898	0.748981	-22.7574	-23.6861	0.9615	0.997	1085	504.509
6	Tana river just below Masinga dam	12.16	41	-8.92588	-	0.976566	0.565431	0.0622778	0.845843	-25.2246	-23.9449	0.9145	1.04	3572	372.085
11	Tana river between Masinga and Katse	42.2	89	-10.2059	22.955	0.941053	0.844565	0.100742	0.898978	-21.4986	-23.7533	1.013	1.075	2173	69.9326
14	Tana river at Kora National Park (Adamsons Falls)	59.55	101.6	-9.24488	22.233	0.836603	1.21125	0.140953	0.405842	-22.2367	-23.4265	1.1045	1.113	502	54.2033
20	Tana river, Sankuri	175.92	98.6	-8.35488	20.801	1.13	2.78427	0.267257	4.42563	-22.7635	-22.8	1.267	1.275	640
21	Tana river, Nanigi	253.08	97.6	-8.80288	20.9425	1.14	3.60329	0.412163	6.32219	-22.863	-24	1.307	1.307	518	103.236
22	Tana river, Masalani	321.533	102.4	-8.35488	21.5235	1.15831	4.39051	0.52923	6.59452	-22.566	-22.9437	1.348	1.352	579	86.5293
23	Tana river, Tana River primate reserve	352.133	96.2	-8.57588	21.324	0.972388	4.59874	0.531256	6.95985	-22.9156	-22.9478	1.371	1.375	612	100.544
24	Tana river, Garsen	402.8	97.1	-8.54088	21.2095	0.735286	4.47937	0.539732	6.1194	-22.1658	-22.7052	1.383	1.391	657	114.805
25	Tana river (Matombe branch), Chalaluma	483	73.7	-8.87188	21.924	0.870027	5.79801	0.666555	5.23077	-21.1645	-23.1064	1.4225	1.462	1543	386.596
